# Supplementary material for: Theoretical Study of the Defects and Doping in Tuning the Electrocatalytic Activity of Graphene for CO2 Reduction
Source: MDPI journal article supplement (doi:10.3390/nano13152273), 2023-08-07
Supplement: s1 [file s1]

# **Theoretical Study of the Defects and Doping in Tuning the Electrocatalytic Activity of Graphene for CO<sub>2</sub> Reduction**

Xiao Su<sup>1</sup>, Fanqi Meng<sup>1</sup>, Xiang Li<sup>1</sup>, Yueying Liu<sup>1</sup>, Hongwei Tan<sup>1,\*</sup>, Guangju Chen<sup>1,\*</sup>

*1. Key Laboratory of Theoretical and Computational Photochemistry, Ministry of Education, College of Chemistry, Beijing Normal University, Beijing 100875, China*

\* Authors to whom correspondence should be addressed.

E-mail address: hongwei.tan@bnu.edu.cn

gjchen@bnu.edu.cn

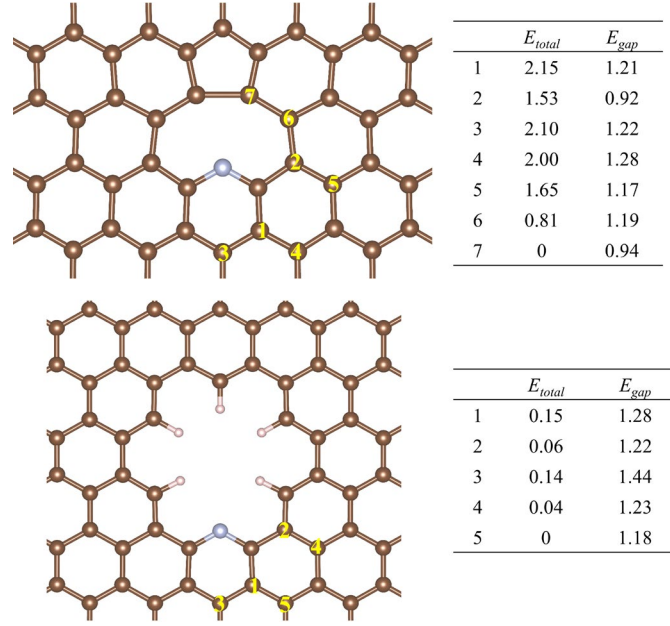

**Figure S1.** The constructed models of (a) void-NBPC and (b) hole-NBPC. The yellow serial marks represent the positions of the doped B atoms.  $E_{total}$  is the relative energy, the No. 7 of void-NBPC and No. 5 of hole-NBPC structures with the lowest energies were selected as the benchmark. The brown, blue, green and pink spheres represent carbon, nitrogen, boron and hydrogen atoms, respectively.

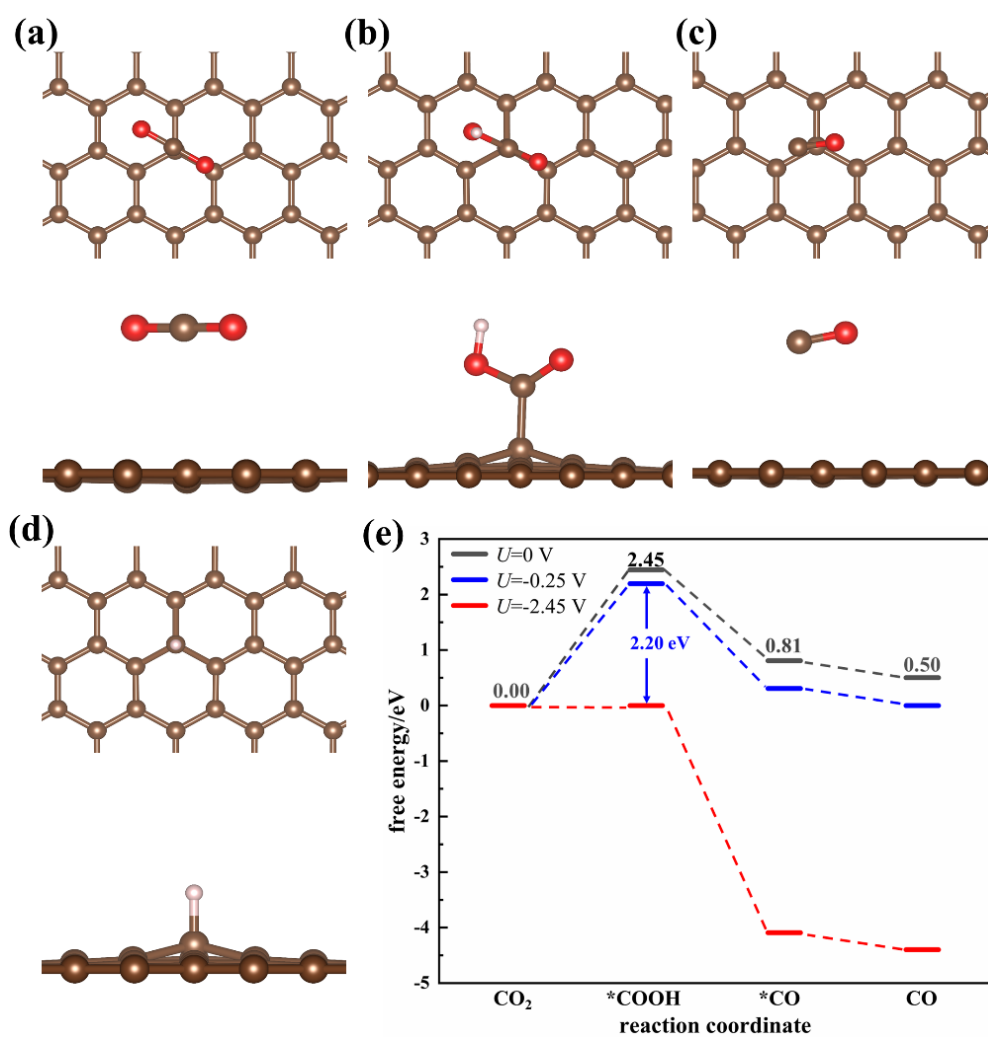

**Figure S2.** Optimized adsorption configurations of (a)  $\text{CO}_2$ , (b)  $\text{COOH}$ , (c)  $\text{CO}$  and (d)  $\text{H}$  on the pristine graphene surface. (e) Free energy profile of  $\text{CO}_2$  reduction on the pristine graphene surface in the solvation environment at different applied potentials. The brown, red and pink spheres represent carbon, oxygen and hydrogen atoms, respectively.

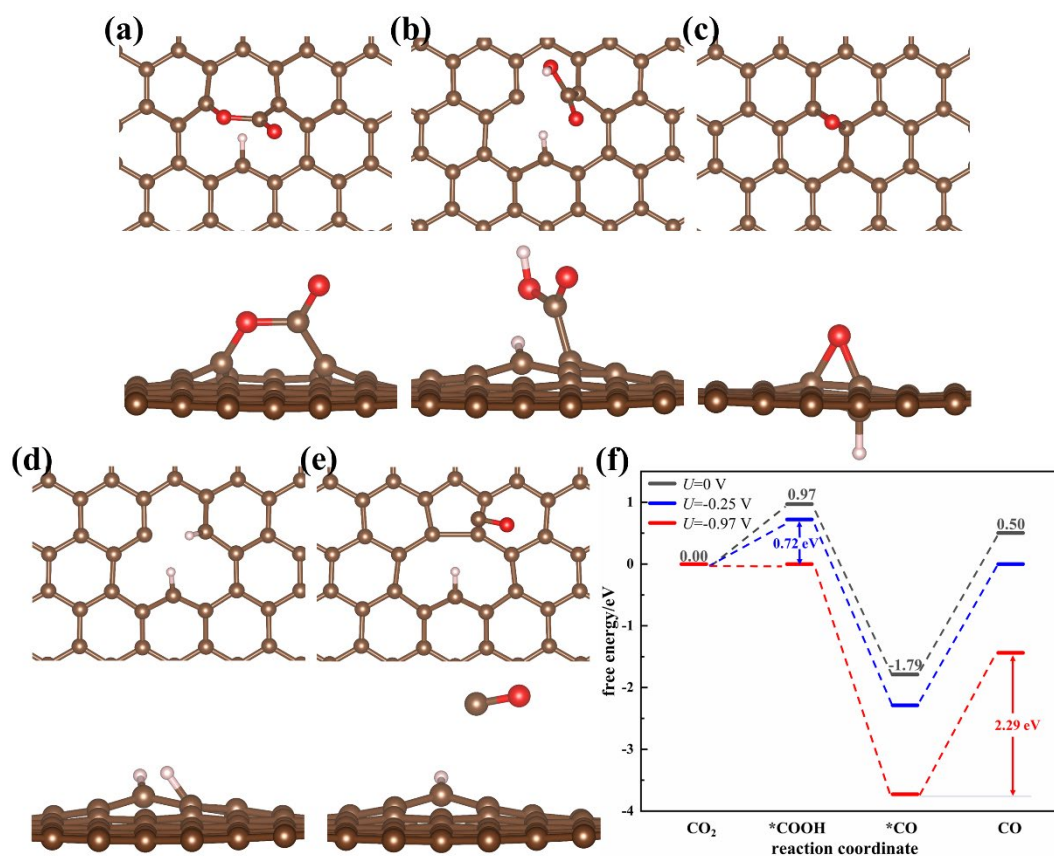

**Figure S3.** Optimized adsorption configurations of (a) CO<sub>2</sub>, (b) COOH, (c) adsorption state CO, (d) H and (e) dissociative state CO on the void-graphene surface. (f) Free energy profile of CO<sub>2</sub> reduction on the void-graphene surface in the solvation environment. The brown, red and pink spheres represent carbon, oxygen and hydrogen atoms, respectively.

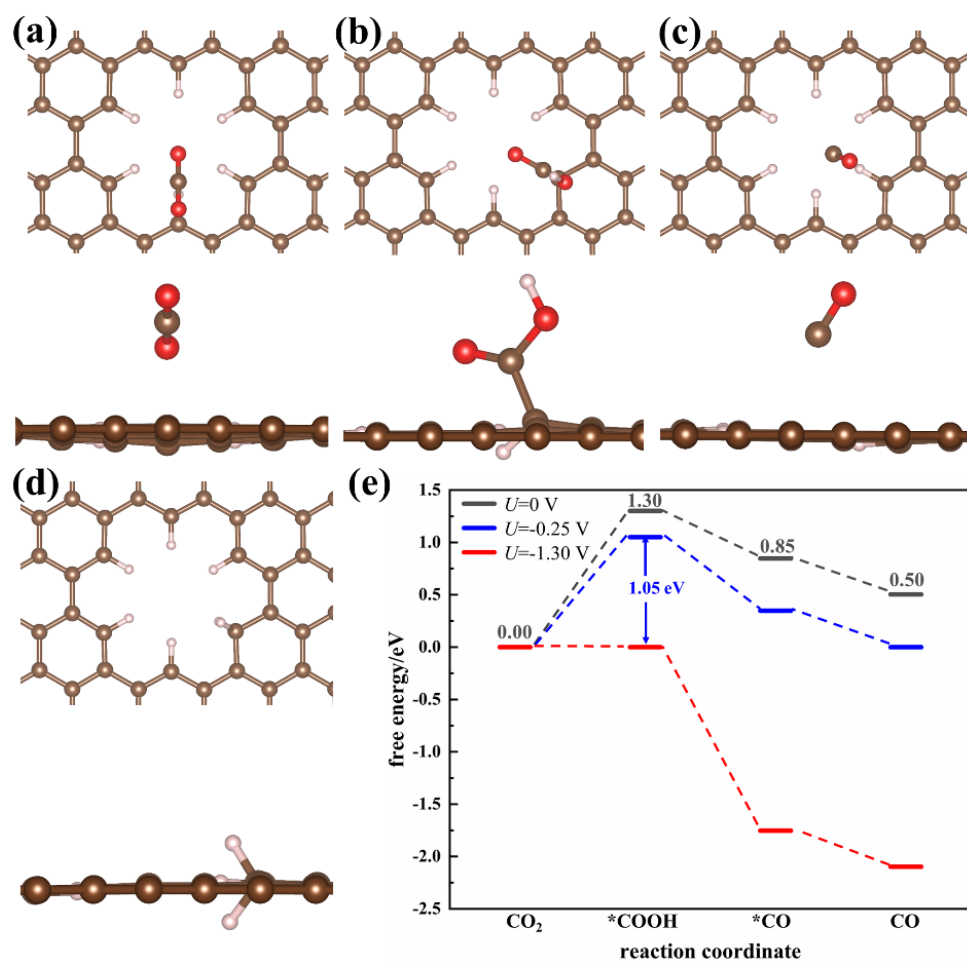

**Figure S4.** Optimized adsorption configurations of (a)  $\text{CO}_2$ , (b)  $\text{COOH}$ , (c)  $\text{CO}$  and (d)  $\text{H}$  on the hole-graphene surface. (e) Free energy profile of  $\text{CO}_2$  reduction on the hole-graphene surface in the solvation environment at different applied potentials. The brown, red and pink spheres represent carbon, oxygen and hydrogen atoms, respectively.

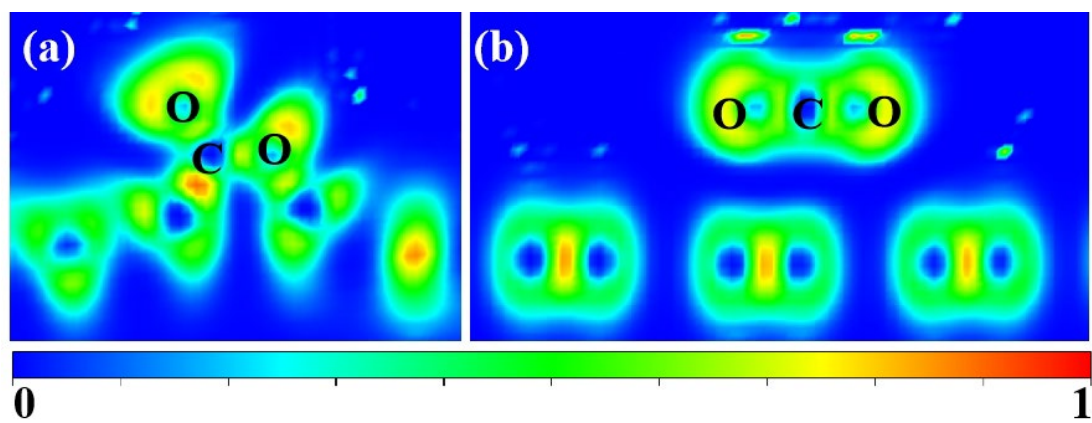

**Figure S5.** ELF results for CO<sub>2</sub> adsorbed on (a) void-NPC and (b) pristine graphene surface.

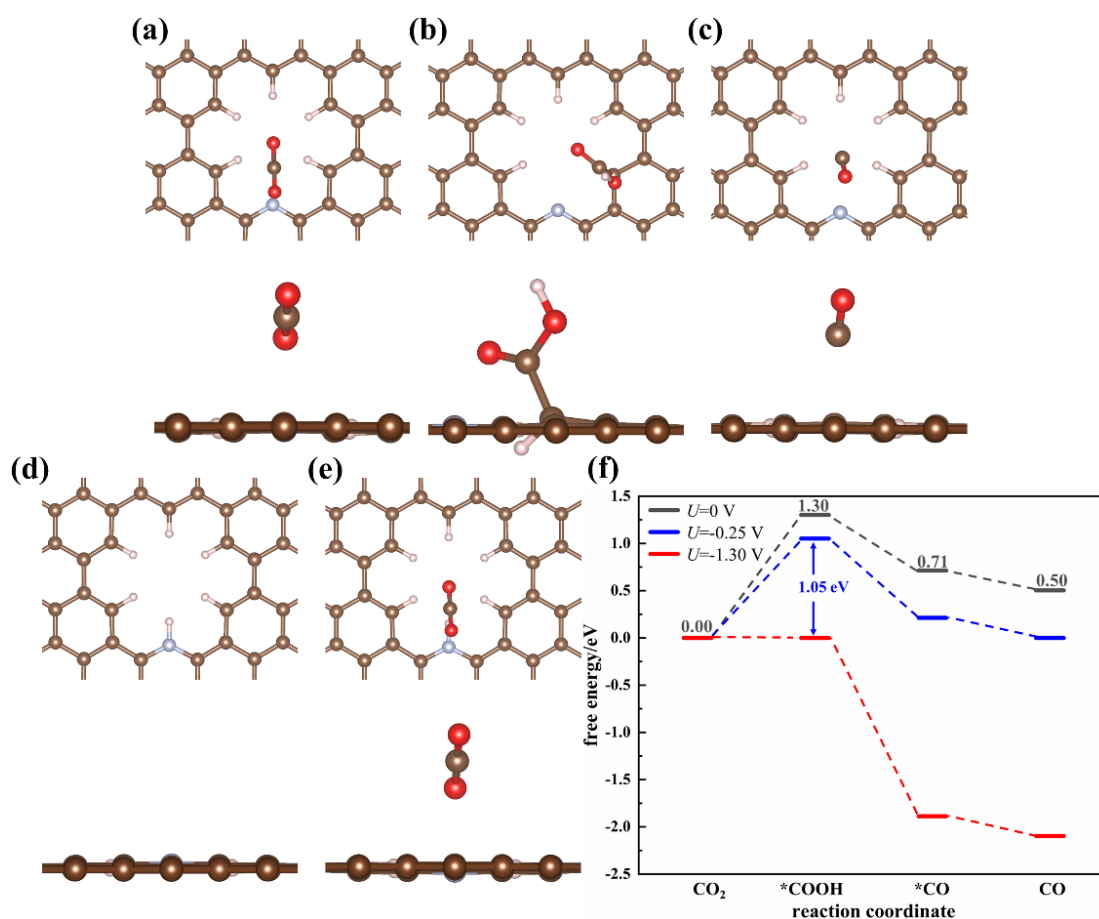

**Figure S6.** Optimized adsorption configurations of (a) CO<sub>2</sub>, (b) COOH, (c) CO, (d) H and (e) CO<sub>2</sub>/H on the hole-NPC surface. (f) Free energy profile of CO<sub>2</sub> reduction on the hole-NPC surface in the solvation environment at different applied potentials. The brown, blue, red and pink spheres represent carbon, nitrogen, oxygen and hydrogen atoms, respectively.

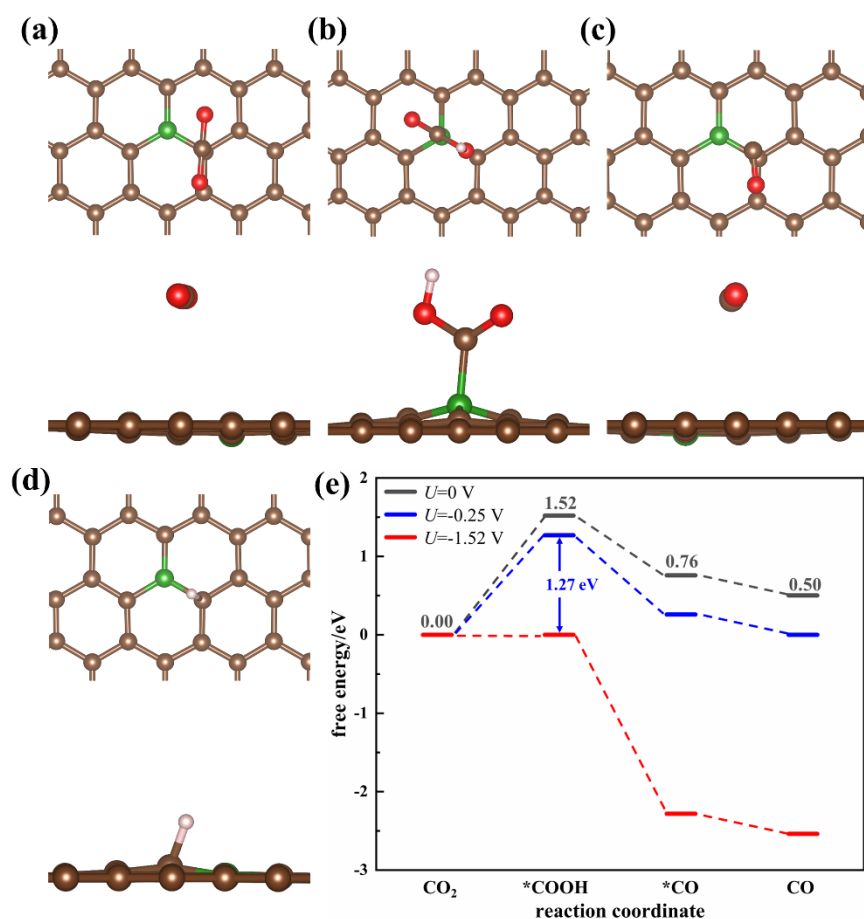

**Figure S7.** Optimized adsorption configurations of (a) CO, (b) COOH, (c) CO and (d) H on the BPC surface. (e) Free energy profile of CO<sub>2</sub> reduction on the BPC surface in the solvation environment at different applied potentials. The brown, green, red and pink spheres represent carbon, boron, oxygen and hydrogen atoms, respectively.



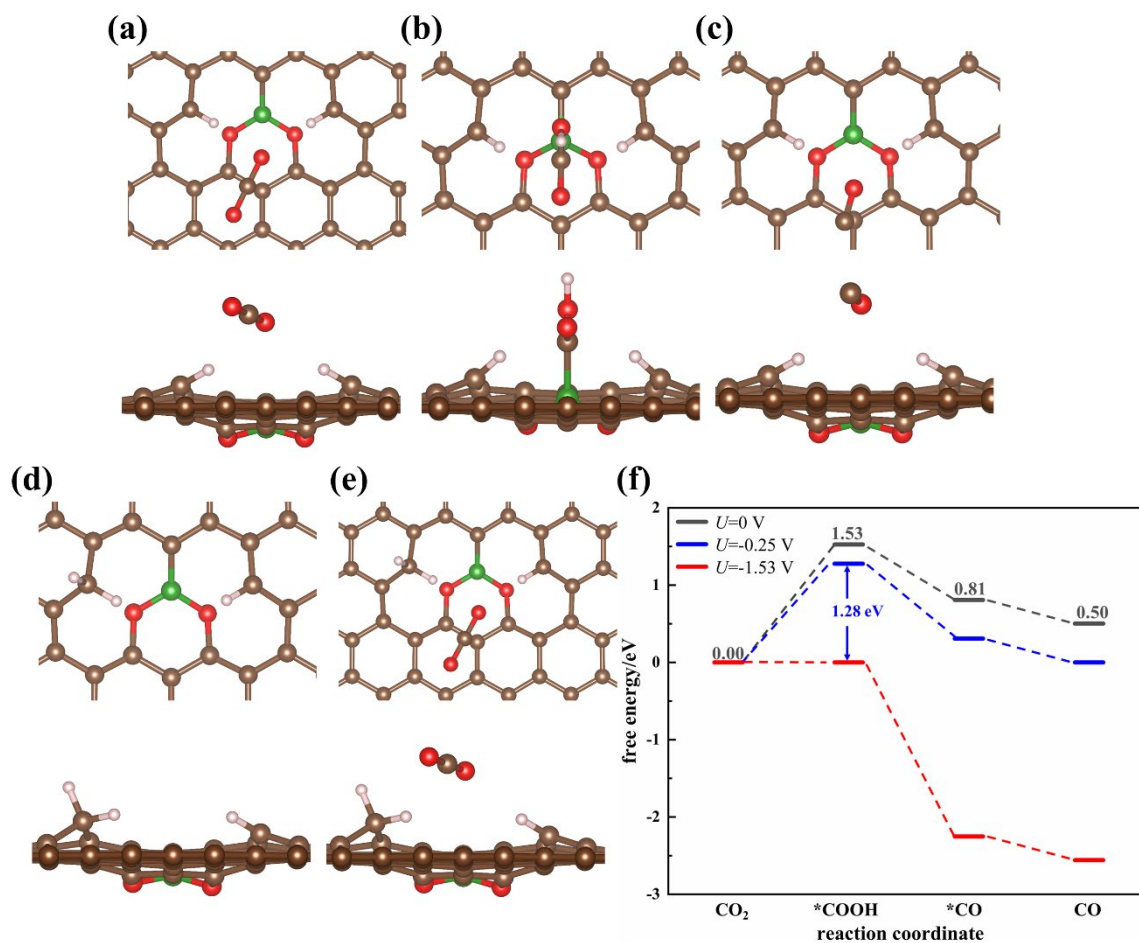

**Figure S8.** Optimized adsorption configurations of (a) CO<sub>2</sub>, (b) COOH, (c) CO, (d) H and (e) CO<sub>2</sub>/H on the BPC-O surface. (f) Free energy profile of CO<sub>2</sub> reduction on the BPC-O surface in the solvation environment at different applied potentials. The brown, green, red and pink spheres represent carbon, boron, oxygen and hydrogen atoms, respectively.

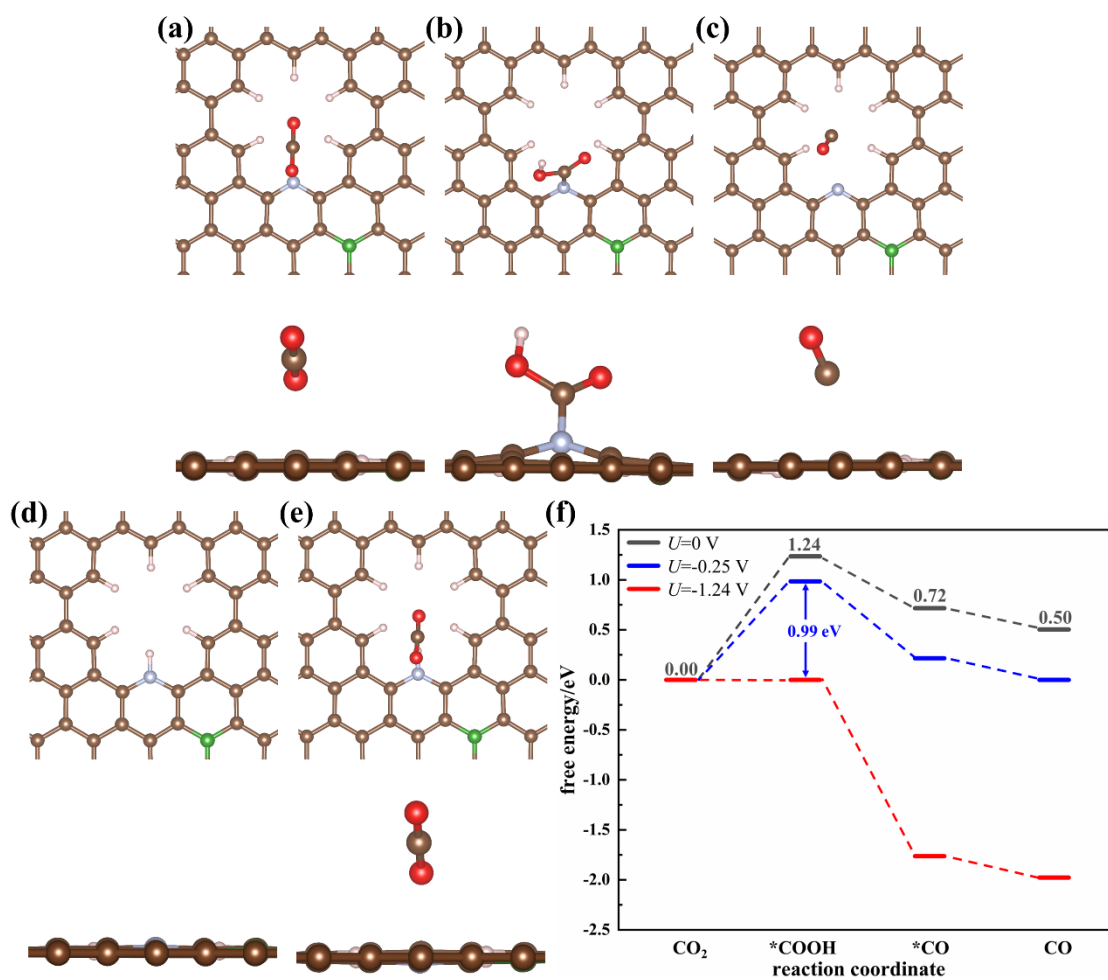

**Figure S9.** Optimized adsorption configurations of (a) CO<sub>2</sub>, (b) COOH, (c) CO, (d) H and (e) CO<sub>2</sub>/H on the hole-NBPC surface. (f) Free energy profile of CO<sub>2</sub> reduction on the hole-NBPC surface in the solvation environment at different applied potentials. The brown, green, red and pink spheres represent carbon, boron, oxygen and hydrogen atoms, respectively.

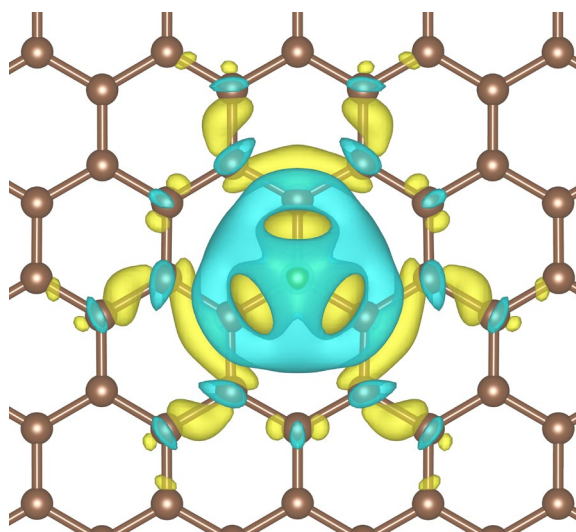

**Figure S10.** Differential charge density of BPC catalyst. Yellow/blue represents charge accumulation/depletion, where the isosurfaces refer to isovalues of  $2 \times 10^{-3} e/\text{bohr}^3$ .
